## Acute coronary syndrome patients with two minor high-bleeding risk criteria have the same bleeding rate that patients with one major criteria

A. Cordero<sup>1</sup>, J.M. Garcia-Acuna<sup>2</sup>, M. Rodriguez-Manero<sup>2</sup>, B. Cid<sup>2</sup>, B. Alvarez Alvarez<sup>2</sup>, R. Agra-Bermejo<sup>2</sup>, D. Escribano<sup>1</sup>,  
V. Bertomeu-Gonzalez<sup>1</sup>, J. Moreno-Arribas<sup>1</sup>, P. Zuazola<sup>1</sup>, J.R. Gonzalez-Juanatey<sup>2</sup>

<sup>1</sup>University Hospital of San Juan, Alicante, Spain; <sup>2</sup>University Hospital of Santiago de Compostela, Cardiology, Santiago de Compostela, Spain

**Funding Acknowledgement:** Type of funding source: None

**Background:** In 2019 the Academic Research Consortium of high-bleeding risk (ARC-HBR) proposed a new and binary definition of high-bleeding risk (HBR) patients based on the presence of 1 major or 2 minor criteria.

**Methods:** Prospective study of all consecutive patients admitted for ACS in two different centers. We analyzed bleeding incidence in patients with 1 major criteria (1MC) vs. 2 minor criteria (2mC) using the 2019 ARC-HBR consensus. Bleeding events were collected according those fitting definitions 3 or 5 of the BARC consortium.

**Results:** We included 8,724 patients included and 40.9% we classified as HBR; 20.9% for 1MC and 20.0% for 2mC. In-hospital major bleeding rate was 8.6%; no-HBR patients had 0.3%, 2mC 15.1% and 1MC 29.7% ( $p < 0.001$  for the comparison). In contrast, the statistically highest in-hospital mortality was observed in patients with 2mC (11.4%), followed by patients with 1MC (8.0%) and no-HBR patients (2.0%).

During follow-up (median time 57.8 months) all-cause mortality rate was 21.0% and cardiovascular dead 14.2%. The incidence of post-discharge major bleeding was 10.5%. No-HBR patients had the lowest bleeding rate (7.4%) and no difference was observed in patients with 1MC (14.6%) or 2mC (15.8%) (figure). The multivariate analysis, adjusted by age, gender, medical treatment, atrial fibrillation and revascularization and considering all-cause mortality as competing risk, showed independent association of 1MC (sHR: 1.46, 95% 1.22–1.75) and 2mC (sHR: 1.31, 95% CI 1.05–1.63) with post-discharge major bleeding.

**Conclusions:** HBR patients according to the 2019 ARC-HBR containing 2mC or 1MC are at similar and higher risk of in-hospital or post-discharge bleeding events

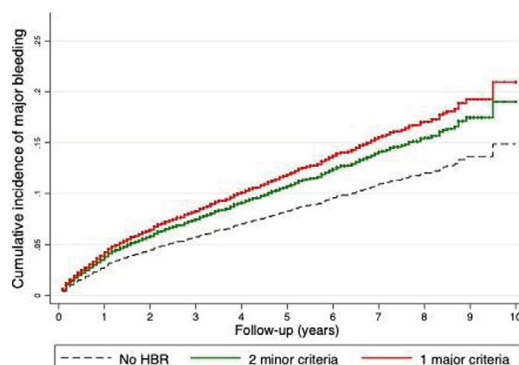

Source: http://academic.oup.com/eurheartj/article-pdf/41/Supplement_2/ehaa946.1311/34516982/ehaa946.1311.pdf
